# Supplementary material for: Prediction of Other-Cause Mortality in Older Patients with Breast Cancer Using Comorbidity
Source: MDPI journal article supplement (doi:10.3390/cancers13071627), 2021-04-01
Supplement: s1 [file s1]

## Article

# Prediction of Other-Cause Mortality in Older Patients with Breast Cancer Using Comorbidity

Anna Z. de Boer <sup>1,2</sup>, Esther Bastiaannet <sup>1,2</sup>, Hein Putter <sup>3</sup>, Perla J. Marang-van de Mheen <sup>4</sup>, Sabine Siesling <sup>5,6</sup>, Linda de Munck <sup>5</sup>, Kelly M. de Ligt <sup>5,6</sup>, Johanneke E.A. Portielje <sup>2</sup>, Gerrit Jan Liefers <sup>1</sup> and Nienke A. de Glas <sup>2,\*</sup>

<sup>1</sup> Department of Surgery, Leiden University Medical Center, 2333 ZA Leiden, The Netherlands; a.z.de\_boer@lumc.nl (A.Z.d.B.); e.bastiaannet@lumc.nl (E.B.); g.j.liefers@lumc.nl (G.J.L.)

<sup>2</sup> Department of Medical Oncology, Leiden University Medical Center, 2333 ZA Leiden, The Netherlands; j.e.a.portielje@lumc.nl

<sup>3</sup> Department of Medical Statistics, Leiden University Medical Center, 2333 ZA Leiden, The Netherlands; h.putter@lumc.nl

<sup>4</sup> Department of Medical Decision Making, Leiden University Medical Center, 2333 ZA Leiden, The Netherlands; p.j.marang-van\_de\_mheen@lumc.nl

<sup>5</sup> Department of Research and Development, Netherlands Comprehensive Cancer Organization, 3500 BN Utrecht, The Netherlands; s.siesling@iknl.nl (S.S.); l.demunck@iknl.nl (L.d.M.); k.d.ligt@nki.nl (K.M.d.L.)

<sup>6</sup> Department of Health Technology and Services Research, Technical Medical Center, University of Twente, 7522 NB Enschede, The Netherlands

\* Correspondence: n.a.de\_glas@lumc.nl

## Supplementary

Citation: de Boer, A.Z.; Bastiaannet, E.; Putter, H.; Marang-van de Mheen, P.J.; Siesling, S.; de Munck, L.; de Ligt, K.M.; Portielje, J.E.A.; Liefers, G.J.; de Glas, N.A. Prediction of Other-Cause Mortality in Older Patients with Breast Cancer Using Comorbidity. *Cancers* 2021, 13, 1627. <https://doi.org/10.3390/cancers13071627>

Academic Editor: David Wong

Received: 1 February 2021

Accepted: 25 March 2021

Published: 1 April 2021

**Publisher's Note:** MDPI stays neutral with regard to jurisdictional claims in published maps and institutional affiliations.

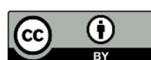

**Copyright:** © 2021 by the authors. Licensee MDPI, Basel, Switzerland. This article is an open access article distributed under the terms and conditions of the Creative Commons Attribution (CC BY) license (<http://creativecommons.org/licenses/by/4.0/>).

**Table S1.** Comorbidity count and specific comorbidities in patients with a Charlson Comorbidity Index score 0 and  $\geq 1$ .

|                                           | Charlson Score 0 | Charlson Score $\geq 1$ |
|-------------------------------------------|------------------|-------------------------|
|                                           | No. (%)          | No. (%)                 |
| Comorbidity count                         |                  |                         |
| 0                                         | 2206 (49.5)      | 0 (0)                   |
| 1                                         | 1556 (34.9)      | 782 (25.63)             |
| 2                                         | 536 (12)         | 1134 (37.17)            |
| $\geq 3$                                  | 162 (3.6)        | 1135 (37.2)             |
| Comorbidities not included in the CCI     |                  |                         |
| Hypertension                              | 1503 (33.7)      | 1468 (48.1)             |
| Arrhythmia                                | 176 (4)          | 166 (5.4)               |
| Valvular heart disease                    | 157 (3.5)        | 137 (4.5)               |
| Thyroid disease                           | 169 (3.8)        | 124 (4.1)               |
| Venous thromboembolism/pulmonary embolism | 102 (2.3)        | 111 (3.6)               |
| Angina pectoris                           | 57 (1.3)         | 109 (3.6)               |
| Hypercholesterolemia                      | 49 (1.1)         | 45 (1.5)                |
| Psychiatric disease (excluding dementia)  | 57 (1.3)         | 33 (1.1)                |

**Table S2.** Subdistribution hazard ratios (sHRs) with 95% confidence intervals of specific comorbidities for 5-year other-cause mortality. Patients without the specific comorbidity were used as referent.

|                                           | No. (%)     | Crude sHR<br>(95% CI) | Adjusted sHR*<br>(95% CI) |
|-------------------------------------------|-------------|-----------------------|---------------------------|
| Specific comorbidity included in CCI      |             |                       |                           |
| Myocardial infarction                     | 671 (8.9)   | 1.57 (1.34 to 1.83)   | 1.32 (1.12 to 1.55)       |
| Congestive heart failure                  | 216 (2.9)   | 2.67 (2.15 to 3.31)   | 1.62 (1.27 to 2.07)       |
| Peripheral vascular disease               | 216 (2.9)   | 1.45 (1.10 to 1.90)   | 1.42 (1.06 to 1.90)       |
| Cerebrovascular disease                   | 545 (7.3)   | 2.54 (2.19 to 2.93)   | 1.90 (1.63 to 2.21)       |
| Dementia                                  | 164 (2.2)   | 5.95 (4.89 to 7.23)   | 4.22 (3.41 to 5.23)       |
| Chronic obstructive pulmonary disease     | 620 (8.3)   | 1.38 (1.17 to 1.63)   | 1.26 (1.05 to 1.51)       |
| Connective tissue disease                 | 212 (2.8)   | 1.56 (1.21 to 2.01)   | 1.56 (1.21 to 2.03)       |
| Peptic ulcer disease                      | 128 (1.7)   | 1.63 (1.17 to 2.27)   | 1.38 (0.97 to 1.97)       |
| Liver disease                             | 31 (0.4)    | 0.85 (0.34 to 2.10)   | 0.90 (0.35 to 2.33)       |
| Diabetes without end to organ damage      | 1219 (16.2) | 1.30 (1.14 to 1.48)   | 1.26 (1.10 to 1.45)       |
| Diabetes with end to organ damage         | 162 (2.2)   | 1.61 (1.22 to 2.14)   | 1.90 (1.41 to 2.55)       |
| Hemiplegia                                | 16 (0.2)    | 4.18 (2.07 to 8.45)   | 2.91 (1.38 to 6.10)       |
| Severe chronic renal disease              | 12 (0.2)    | 4.74 (2.02 to 11.09)  | 3.38 (1.24 to 9.25)       |
| Other frequently occurring comorbidities  |             |                       |                           |
| Hypertension                              | 2971 (39.6) | 1.07 (0.96 to 1.19)   | 0.98 (0.88 to 1.09)       |
| Arrhythmia                                | 342 (4.6)   | 1.67 (1.36 to 2.06)   | 1.18 (0.95 to 1.45)       |
| Valvular heart disease                    | 294 (3.9)   | 1.45 (1.15 to 1.83)   | 1.23 (0.97 to 1.55)       |
| Thyroid disease                           | 293 (3.9)   | 0.93 (0.70 to 1.24)   | 0.83 (0.61 to 1.13)       |
| Venous thrombo-/pulmonary embolism        | 213 (2.8)   | 1.29 (0.98 to 1.71)   | 1.20 (0.91 to 1.58)       |
| Angina pectoris                           | 166 (2.2)   | 1.31 (0.97 to 1.78)   | 1.10 (0.81 to 1.49)       |
| Hypercholesterolemia                      | 94 (1.3)    | 0.73 (0.44 to 1.23)   | 0.69 (0.41 to 1.14)       |
| Psychiatric diseases (excluding dementia) | 90 (1.2)    | 1.64 (1.13 to 2.37)   | 2.44 (1.70 to 3.50)       |

\*The multivariable model included all specific comorbidities and age.

**Table S3.** Sensitivity analysis. Crude and multivariate subdistribution hazard ratios for 5-year other-cause mortality by Charlson index and comorbidity count. The first multivariate model was adjusted for age alone, and the second multivariate model was adjusted for age and tumor characteristics: stage, grade and endocrine receptor status.

| Comorbidity Category | Charlson Index         |                        |                                | Comorbidity Count      |                        |                                |
|----------------------|------------------------|------------------------|--------------------------------|------------------------|------------------------|--------------------------------|
|                      | Crude                  | Adjusted for           |                                | Crude                  | Adjusted for           |                                |
|                      |                        | Age-Adjusted           | Age and Tumor Characteristics* |                        | Age-Adjusted           | Age and Tumor Characteristics* |
|                      | sHR (95% CI)           | sHR (95% CI)           | sHR (95% CI)                   | sHR (95% CI)           | sHR (95% CI)           | sHR (95% CI)                   |
| 0                    | Referent               | Referent               | Referent                       | Referent               | Referent               | Referent                       |
| 1                    | 1.80<br>(1.59 to 2.03) | 1.69<br>(1.49 to 1.90) | 1.71<br>(1.50 to 1.94)         | 1.60<br>(1.37 to 1.87) | 1.42<br>(1.21 to 1.65) | 1.45<br>(1.24 to 1.71)         |
| 2                    | 2.05<br>(1.76 to 2.39) | 1.80<br>(1.54 to 2.10) | 1.76<br>(1.50 to 2.07)         | 2.01<br>(1.71 to 2.35) | 1.73<br>(1.48 to 2.03) | 1.71<br>(1.45 to 2.01)         |
| ≥3                   | 2.96<br>(2.49 to 3.53) | 2.82<br>(2.35 to 3.38) | 2.89<br>(2.38 to 3.50)         | 3.04<br>(2.60 to 3.56) | 2.45<br>(2.09 to 2.88) | 2.40<br>(2.03 to 2.84)         |

\*Multivariate model including age, stage, grade and hormone receptor status.

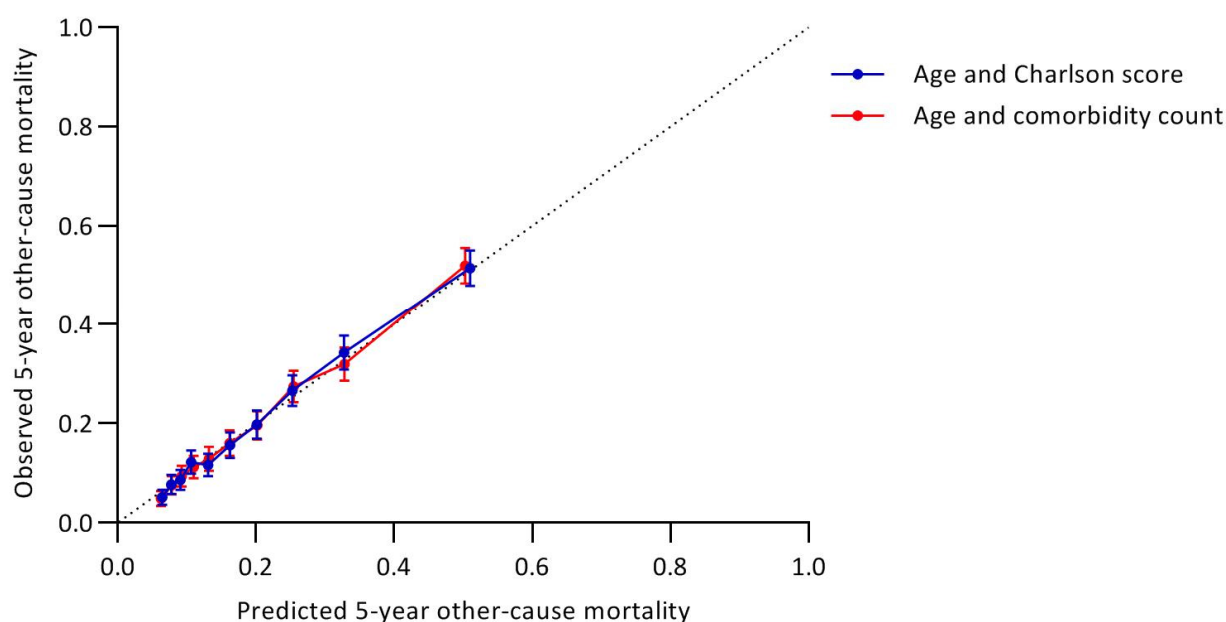

**Figure S1.** Calibration of the two Fine and Gray models for prediction of 5-year other-cause mortality, including age and Charlson score (blue), and age and comorbidity count (red).
